# Supplementary material for: Suitability of testers to characterize provitamin a content and agronomic performance of tropical maize inbred lines
Source: Front Genet. 2022 Aug 8;13:955420. doi: 10.3389/fgene.2022.955420 (PMC9394681; doi:10.3389/fgene.2022.955420)
Supplement: Supplementary file 1 [file Table2.XLSX]

## Sheet: Sheet1
Supplementary Table S2. Mean grain yield and other agronomic traits as well as provitamin A and other carotenoids of testcrosses of 60 PVA inbred lines and checks evaluated across eight test environements in Nigeria.
Hybrid	Grain yield	Days to anthesis	Days to silking	Plant height	Ear height	Plant aspect	Ear aspect	Lutein	Zeaxanthin	β-Cryptoxanthin	α-Carotene	β-Carotene	Provitamin A
	(kg/ha)	(days)		(cm)		(1-5)		(µg/g)
TZI1276xT1	6794.29	57.0625	58.8125	207.75	103.687	2.25	2.34375	7.6675	5.7312	2.56125	1.03625	11.3412	13.1412
TZI1276xT2	6687.55	57.5	59.25	198.562	95.75	2.41667	2.375	4.8412	11.4337	3.56	0.70625	7.0762	9.2087
TZI1278xT1	6613.89	58.9375	60.625	199.562	103.437	2.04167	2.28125	8.1175	9.23	3.77625	0.8525	10.6612	12.9775
TZI1278xT2	7153.18	57.8125	59.5	196.5	94.375	1.95833	2.375	5.2712	14.5237	5.8475	1.0625	8.605	12.0612
TZI1279xT1	6303.28	56.8125	58.375	213.812	107.75	2.20833	2.5	6.52	7.3462	3.06875	0.775	10.0762	11.9987
TZI1279xT2	6725.28	55.625	57.125	213.437	102.5	2.04167	2.21875	6.445	12.6312	4.76875	0.855	7.2712	10.0837
TZI1281xT1	6394.15	58.75	60.4375	208.875	108.75	2.41667	2.25	11.235	9.7587	2.97375	0.8675	9.8475	11.77
TZI1281xT2	6175.7	57.3125	58.9375	198.687	104.125	2.45833	2.21875	7.9262	15.9325	3.66875	0.75125	6.5862	8.7975
TZI1282xT1	6178.37	58.0625	59.625	203.812	102.812	2.375	2.5625	9.0675	8.3275	3.13875	0.71875	8.5112	10.4412
TZI1282xT2	6943.4	57.1875	59.0625	204.562	102.312	2.29167	2.09375	6.0062	11.7212	3.305	0.84	5.5637	7.635
TZI1289xT1	5917.59	57.375	59.125	210.625	113.875	2.33333	2.84375	8.3837	9.6262	3.19	0.6825	7.1062	9.0412
TZI1289xT2	5324.22	56.9375	58.5	211.625	107.25	2.41667	2.40625	5.3562	13.58	3.4775	0.58375	4.1637	6.1962
TZI1296-1xT1	6831.07	58.0625	59.5	191.187	100.625	2.125	2.5625	5.6587	11.2612	4.05	0.79875	9.8437	12.2687
TZI1296-1xT2	6808.53	57.3125	58.9375	189.75	95.625	2.25	2.5625	4.5912	14.2612	5.01125	0.8225	6.9225	9.8375
TZI1296-2xT1	6144.7	57.8125	59.5625	191.187	97.187	2.5	2.4375	5.61	9.7875	4.90125	1.22625	9.0837	12.1462
TZI1296-2xT2	6212.63	58.3125	59.5	186.25	94.687	2.29167	2.65625	5.1987	11.9337	5.5825	1.02125	7.0512	10.3512
TZI1297xT1	6720.18	59.5625	60.8125	189.625	100	2.45833	2.40625	7.345	7.33	4.26875	0.86625	10.1	12.6687
TZI1297xT2	4206.17	58.4654	59.7396	180.091	86.542	2.80477	2.84444	7.2937	13.1112	5.82625	1.005	7.5512	10.9675
TZI1299xT1	6593.02	58.125	59.6875	195.875	94.687	2.5	3	7.865	7.3725	4.54375	0.89125	10.8862	13.605
TZI1299xT2	5555.92	57.3125	58.8125	178.375	84.687	3.04167	2.96875	7.8062	13.7937	6.34	1.0825	8.0025	11.715
TZI1302-1xT1	6517.81	57.375	59.0625	191.875	93.437	2.375	2.46875	7.49	8.3412	4.1675	0.7575	9.68	12.145
TZI1302-1xT2	5841.77	57.8125	59.375	181.687	87.5	2.95833	3	5.3812	13.4912	5.75875	0.81	7.0137	10.2987
TZI1302-2xT1	7652.32	57.1875	58.625	198	94.375	2.20833	2.21875	9.02	7.3025	3.9875	0.84375	10.105	12.5225
TZI1302-2xT2	6493.94	57.25	58.875	180.75	86.25	2.95833	2.625	5.31	11.8262	6.7475	1.08375	6.4737	10.39
TZI1304xT1	6677.18	56.5	58.3125	191.687	94.687	2.54167	2.4375	6.7925	12.6962	5.83625	1.0825	10.13	13.59
TZI1304xT2	6100.59	56.0625	57.75	177.5	87.812	2.66667	2.71875	6.8425	17.705	6.34375	0.88375	7.6825	11.2962
TZI1305xT1	5682.75	56.5625	58.0625	186.25	88.062	2.70833	2.6875	8.5125	9.5825	4.2925	0.92	10.415	13.02
TZI1305xT2	6532.59	55	56.4375	179.312	81.625	2.91667	2.5625	5.2925	12.2537	4.88875	0.83125	7.3737	10.2362
TZI1310-1xT1	6901.21	56.5625	58	183.5	87.062	2.66667	2.4375	9.215	9.45	3.635	0.72125	10.8912	13.07
TZI1310-1xT2	4975.09	56.4375	57.8125	165.312	81.25	3.08333	2.9375	8.0562	16.4762	5.6575	0.95875	7.785	11.0925
TZI1310-2xT1	6168.25	56.5	57.875	178.625	89.062	2.91667	2.8125	7.8812	9.6512	3.95125	0.82125	11.1375	13.5225
TZI1310-2xT2	5457.37	55.9375	57.375	168.937	85.937	3.25	2.96875	7.6287	15.48	5.555	1.1	7.5412	10.8675
TZI1312xT1	5034.38	57.6875	59.3125	182.562	80.312	3.16667	3.0625	10.6825	6.8125	3.96	0.80125	8.3387	10.72
TZI1312xT2	5568.74	56.125	57.8125	178.375	89.062	2.83333	2.71875	7.0225	12.7862	5.84375	1.29	8.0075	11.5737
TZI1314xT1	6439.85	55.375	56.375	177.687	88.875	2.5	2.4375	6.3975	8.97	4.0225	0.875	9.7987	12.2487
TZI1314xT1	6918.43	55.125	56.625	193.937	91.562	2.58333	2.5	5.5587	9.8437	5.62875	1.0475	8.8562	12.195
TZI1314xT2	6238.67	54.1875	55.625	173.437	82.187	2.83333	2.25	5.2275	15.395	4.82375	0.8575	6.8162	9.6575
TZI1314xT2	7143.52	55.25	56.75	181.687	85.375	2.45833	2.28125	4.9387	16.7275	6.2075	1.1375	7.5137	11.1837
TZI1653xT1	3994.73	58	59.625	185.875	86.625	2.875	3.34375	10.5612	5.965	2.88875	0.88625	16.1375	18.0275
TZI1653xT2	5875.97	56	57.6875	190.75	85.625	2.875	2.4375	14.9175	12.3112	5.14875	0.9725	9.1212	12.18
TZI1715xT1	4824.61	58.875	60.4375	188.625	91	2.83333	3.125	4.5675	4.415	2.10875	0.66375	16.4687	17.8537
TZI1715xT2	7257.44	55.625	57.0625	198.5	93.125	2.25	2.28125	5.2962	10.5787	4.42875	0.92375	12.3975	15.0725
TZI2004xT1	5271.99	59.1875	60.8125	197.25	102.5	2.25	2.71875	7.0875	6.7025	2.2975	0.53625	9.0012	10.4175
TZI2004xT2	6841.26	57.0625	58.3125	190.562	95	2.625	2.25	6.3175	10.14	3.6	0.72	7.1925	9.355
TZI2005-1xT1	4485.13	59.125	60.9375	202.812	102.187	2.95833	3	8.8675	7.765	3.48125	0.76375	9.41	11.5325
TZI2005-1xT2	5762.81	58	59.625	193.562	97.187	2.58333	2.4375	9.2612	13.7987	5.02	0.83375	6.105	9.0312
TZI2005-2xT1	5820.79	58.375	59.875	212.187	109.687	2.25	2.40625	10.8562	9.5075	4.005	0.8275	8.6112	11.0275
TZI2005-2xT2	6935.57	55.875	57.4375	201.937	102.5	2.5	2.34375	7.705	15.02	5.66875	0.965	6.7887	10.1075
TZI2005-3xT1	5860.36	58	59.6875	206	105.625	2.5	2.6875	7.2837	6.5312	3.56625	0.81125	10.6262	12.8162
TZI2005-3xT2	6168.9	57.3125	58.8125	187.562	90.625	2.54167	2.5	7.1662	13.2312	4.70875	1.07125	8.185	11.0737
TZI2006xT1	5265.46	59.1875	61.0625	179.125	85.312	2.5	3	7.0687	5.1512	2.86125	0.7625	12.5037	14.315
TZI2006xT2	4741.56	56.375	57.9375	181.375	82.5	2.66667	2.75	5.8387	6.8025	4.06625	0.81625	7.7375	10.1812
TZI2012-1xT1	6575.99	55.75	57.25	178.625	84.687	2.58333	2.40625	7.2887	4.3412	3.78875	0.8275	11.1025	13.4125
TZI2012-1xT2	6706.8	54.25	55.875	176.375	81.875	2.66667	2.3125	6.3062	7.85	5.07	1.05125	7.5775	10.64
TZI2012-2xT1	6107.46	56.4375	58.0625	184.687	85.625	2.54167	2.6875	8.4187	4.9037	3.51625	0.945	13.13	15.3612
TZI2012-2xT2	6165.91	55.6875	57.5	177.812	78.937	2.58333	2.71875	9.0737	8.97	5.33375	0.99375	8.53	11.6912
TZI2015xT1	6270.15	58.3125	59.8125	203.5	96.875	2.54167	2.375	9.285	6.84	3.2825	0.74125	6.4137	8.425
TZI2015xT2	7121.44	57.3125	59	199.25	102.25	2.54167	2.40625	8.6487	10.9275	3.765	0.585	5.3575	7.5275
TZI2019xT1	5944.87	59.8125	61.3125	201.125	104.25	2.5	2.34375	8.7062	6.7487	3.795	0.80375	9.075	11.3762
TZI2019xT2	6289.75	57.5625	59.5625	189.25	85.312	2.41667	2.25	7.8675	10.7812	4.895	1.11625	7.7037	10.7087
TZI2020xT1	6059.18	56.25	57.8125	191.562	88.437	2.375	2.1875	11.1787	10.245	4.4425	0.89375	9.1125	11.7837
TZI2020xT2	6157.38	55.6875	57.5	182.187	83.375	2.54167	2.4375	8.215	12.4062	4.665	0.735	5.31	8.0112
TZI2024xT1	6722.6	58.5625	60.125	186.937	83.5	2.25	2.5625	7.9437	6.3612	3.155	0.8925	11.0362	13.0575
TZI2024xT2	5550.58	57.0625	58.875	179.812	81.875	2.33333	2.8125	6.5912	10.2612	3.615	0.71625	7.4775	9.645
TZI2025xT1	7256.04	57.5625	59.0625	197.125	99.437	2.125	2.28125	7.5087	3.4112	1.95	0.63625	13.7062	15
TZI2025xT2	5251.97	56.1875	58.125	180.375	84.375	3	3	6.4525	7.2637	3.0825	0.7025	9.5487	11.5
TZI2026-1xT1	6399.78	55.9375	57.375	180.5	85.312	2.29167	2.5625	8.03	9.5362	3.245	0.66125	8.3637	10.3162
TZI2026-1xT2	5702.39	56.5625	58.375	175.875	81.875	2.70833	2.6875	6.3375	14.2725	4.1875	0.8	5.8487	8.345
TZI2026-2xT1	6183.77	56.5	57.9375	180.562	87.5	2.58333	2.4375	6.8587	8.5637	3.36875	0.81625	8.1262	10.22
TZI2026-2xT2	5512.42	56.8125	58.3125	171.187	81.25	2.75	2.78125	6.7962	14.9237	4.58625	0.9325	6.2062	8.9675
TZI2026-3xT1	5764.07	55.9375	57.4375	181.687	85.625	2.66667	2.5625	8.3525	8.6337	3.47	0.7275	8.9412	11.04
TZI2026-3xT2	5546.57	56.3125	58.25	174.437	77.812	2.79167	2.5625	6.44	13.0037	4.4125	0.85625	5.8025	8.4362
TZI2028-1xT1	7620.08	56.5625	57.9375	189.562	84.812	2.33333	2.28125	10.3012	8.1775	3.405	0.805	9.7687	11.875
TZI2028-1xT2	6746.29	56.375	57.9375	186.062	83	3.04167	2.5625	6.48	11.9762	5.15	1.09625	6.43	9.555
TZI2028-2xT1	6798.39	56.6875	58.125	193.062	87.187	2.58333	2.4375	9.9362	6.9787	3.735	0.77125	9.2112	11.4662
TZI2028-2xT2	6894.07	56.625	58.0625	186.312	84.375	2.70833	2.3125	7.6512	12.1012	5.17125	0.9225	6.8625	9.9087
TZI2029xT1	5980.35	55.9375	57.625	181.875	83.125	2.66667	2.46875	12.2462	6.6875	3.08625	0.675	9.3037	11.1825
TZI2029xT2	5653.06	57.0625	59.125	177	81.562	2.83333	2.8125	7.0187	9.9175	3.815	0.7825	6.8525	9.1512
TZI2032xT1	7906.1	58.875	60.5	190.812	95.312	2.04167	2.03125	6.81	9.625	3.83	0.8575	10.5562	12.8962
TZI2032xT2	6699.46	57.8125	59.5625	186.5	97.25	2.29167	2.4375	8.175	17.195	4.915	1.0675	7.3775	10.3675
TZI2037xT1	6618.97	56.625	58.1875	202.125	95	2.45833	2.625	6.91	5.2962	1.92375	0.5075	10.4487	11.6637
TZI2037xT2	7618.21	55.5	57.0625	212.125	101.25	2.33333	2.4375	5.8862	9.4412	2.79375	0.53	6.9487	8.6112
TZI2038xT1	4844.09	57	58.5	204.187	100.812	2.54167	2.9375	15.7687	5.8987	3.2275	0.85875	9.3612	11.4037
TZI2038xT2	6760.91	55.5625	57.125	209.375	101.25	2	2.28125	12.7075	7.0962	4.375	0.95	5.7012	8.3625
TZI2040xT1	4976.23	58	59.6875	193.875	95.437	2.625	3.15625	11.8787	9.4425	5.165	0.99125	9.1875	12.2662
TZI2040xT2	6919.8	56.5625	58.1875	197.25	98.437	2.16667	2.40625	8.725	11.6637	5.88	1.48125	5.8362	9.5175
TZI2046xT1	7314.95	57.5625	59.0625	208.812	104.5	2.41667	2.25	6.1012	9.9125	4.40875	0.87625	9.0675	11.71
TZI2046xT2	6514.86	57.625	59.0625	186.625	88.75	2.54167	2.40625	5.0712	13.9987	5.84625	1.01	5.435	8.8625
TZI2065-1xT1	6202.82	56.6875	58.375	208.875	106.562	2.41667	2.75	8.6487	5.3	2.3875	0.555	8.945	10.415
TZI2065-1xT2	6766.17	55.5625	57.0625	198.812	94.375	2.33333	2.21875	10.2575	9.4837	3.63	0.8475	8.7425	10.9775
TZI2065-2xT1	5694.64	58.125	59.75	201.937	99.75	2.66667	2.625	5.8512	3.8187	1.78125	0.54	13.7837	14.9462
TZI2065-2xT2	6757.61	56.0625	57.875	192.75	94.375	2.45833	2.15625	8.495	11.7937	3.58375	0.69875	8.65	10.7925
TZI2066-1xT1	4819.77	57.25	58.6875	189.812	94.375	2.95833	3	9.5675	4.61	2.225	0.765	13.77	15.2612
TZI2066-1xT2	5705.21	54.5	55.8125	184.437	91.562	2.66667	2.5	8.6587	9.5262	3.70375	0.76625	10.2337	12.47
TZI2066-2xT1	5468.32	57.4375	59	183.875	88.312	2.875	3.03125	7.9787	4.7337	2.3725	0.61125	12.8637	14.355
TZI2066-2xT2	6627.89	55.8125	57.1875	192.687	91.75	2.54167	2.34375	7.49	8.8925	3.75	0.82125	9.5687	11.8587
TZI2068xT1	5567.43	59.0625	60.8125	202.625	102.5	2.625	2.4375	9.63	7.405	2.69	0.655	8.8837	10.5562
TZI2068xT2	6798.13	57.125	58.75	191.562	97.375	2.16667	2.28125	9.225	9.075	2.4525	0.57875	6.6037	8.12
TZI2071xT1	5087.54	57.75	59.3125	198.187	91.125	2.58333	2.78125	10.8175	5.2887	2.4025	0.825	12.7162	14.3287
TZI2071xT2	7094.27	54.5	55.9375	198.437	96.25	2	2.1875	9.04	10.5137	3.1075	0.77	9.61	11.55
TZI2116xT1	4486.61	57.875	59.4375	195.75	102.375	2.83333	2.84375	7.5725	6.1537	2.465	0.70125	16.835	18.4187
TZI2116xT2	5944.72	56.25	57.4375	192.25	97.5	2.5	2.40625	6.605	11.9212	4.38375	0.94875	11.42	14.0862
TZI2117xT1	5361.03	58.625	60.1875	183.062	90.812	2.54167	2.84375	13.0167	5.5312	1.555	0.64875	11.6337	12.735
TZI2117xT2	6462.53	58.25	60	193.312	94.062	2.41667	2.65625	13.8725	8.705	2.79125	0.665	7.1687	8.8987
TZI2130xT1	6259.34	57.6875	59.125	192.125	97.937	2.5	2.40625	19.4625	4.4587	1.4875	0.5875	12.92	13.9575
TZI2130xT2	6754.8	56.375	57.6875	180.687	91.625	2.625	2.71875	11.3125	9.9637	3.75	0.74625	8.0825	10.3312
TZI2142-1xT1	6187.99	56.3125	57.6875	195.125	86.562	2.54167	2.46875	5.8625	8.295	3.86875	0.8225	10.2262	12.5737
TZI2142-1xT2	6357.97	55.75	57.5625	186.687	84.687	2.95833	2.5	4.3125	10.3962	5.1275	0.99125	6.7525	9.81
TZI2142-2xT1	6127.52	56.25	58.0625	203.687	97.5	2.41667	2.5	6.305	6.155	2.39375	0.725	12.935	14.495
TZI2142-2xT2	6428.23	55.0625	56.75	193.937	84.375	2.70833	2.6875	6.605	12.0037	4.11875	0.9325	8.2687	10.795
TZI2156xT1	7544.85	56.8125	58.375	200.125	96.75	2.25	2.15625	11.4237	9.65	3.0325	0.7425	10.7375	12.6262
TZI2156xT2	6040.84	57	58.8125	190.5	91.25	2.70833	2.59375	9.9325	14.0637	3.14625	0.60625	6.825	8.7012
TZI2161xT1	7305.45	58.3125	60	205.25	105.625	1.875	1.8125	8.9487	8.4925	4.5225	0.93125	10.0087	12.7375
TZI2161xT2	7443.2	57.25	58.875	198.125	99.687	2.16667	1.90625	7.3387	13.2725	6.89875	1.35625	7.7475	11.8762
TZI2163-1xT1	5822.16	56.375	57.9375	192.312	93.25	2.58333	2.5625	6.775	5.525	2.36875	0.65625	10.795	12.3062
TZI2163-1xT2	5697.15	56	57.6875	183.687	89.5	2.66667	2.6875	5.64	9.3387	3.7675	0.8125	8.4225	10.71
TZI2163-2xT1	5611.61	56.6875	58.0625	193.75	92.812	2.58333	2.8125	6.8962	4.5775	2.4625	0.69625	13.0062	14.5837
TZI2163-2xT2	5895.26	55.0625	56.5625	181.687	84.375	2.91667	2.65625	6.1912	10.8912	3.95375	0.78125	8.1362	10.5025
TZI2182xT1	4378.31	59.625	61.125	194.062	98.5	2.75	3.09375	4.3182	1.7775	1.35875	0.52	15.9225	16.8625
TZI2182xT2	7274.9	55.9375	57.3125	200.75	99.125	2	2.21875	6.3637	6.05	3.76625	0.67875	10.0225	12.245
T1xT2	6085.13	55.75	57.1875	188.562	92.812	2.375	2.25	6.9462	5.8687	3.55625	0.71375	7.2575	9.3937
Ife Hybrid-3	6430.88	55.1875	56.75	190.812	92.125	2.41667	2.25	6.5062	13.8	6.18375	1.18625	7.6112	11.2975
Ife Hybrid-4	7083.94	58.375	60.0625	225.25	113.812	2.5	2.03125	7.9637	11.8212	5.085	1.2	8.2162	11.3587
Oba Super 2	5755.31	58.3125	60	183.187	91	2.70833	2.84375	7.69	17.6137	3.2075	0.6825	3.9812	5.9237
Mean	6200.25	56.9733	58.5515	191.514	93.1014	2.53365	2.53784	7.9011	9.70825	3.97346	0.840353	9.01707	11.4246
LSD	941.84	0.96	0.9858	8.99	6.936	0.41105	0.32082	2.2316	2.3351	0.75525	0.3004	2.1573	2.2661
Repeatability	0.82	0.92	0.92	0.91	0.91	0.72	0.84	0.8921	0.9422	0.95132	0.64705	0.9058	0.8696
